# Supplementary material
Source: PubMed Central journal article supplement (PMC4582011)
Supplement: NIHMS722049-supplement-SI.pdf [file NIHMS722049-supplement-SI.pdf]

## Supporting Information

### Peptide Bond Formation Mechanism Catalyzed by Ribosome

**Katarzyna Świderek,<sup>1,2</sup> Sergio Marti,<sup>1</sup> Iñaki Tuñón,<sup>3</sup> Vicent Moliner,<sup>1</sup> Juan Bertrán<sup>4</sup>**

1. Departament de Química Física i Analítica; Universitat Jaume I, 12071 Castellón (Spain)

2. Institute of Applied Radiation Chemistry, Lodz University of Technology, 90-924 Lodz, (Poland)

3. Departament de Química Física, Universitat de València, 46100 Burjasot, (Spain)

4. Departament de Química; Universitat Autònoma de Barcelona, 08193 Bellaterra, (Spain)

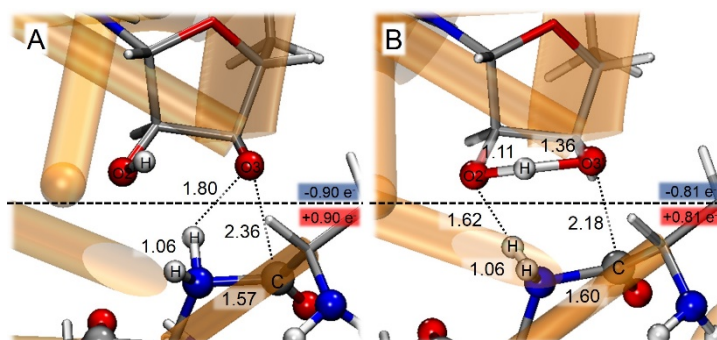

**Figure S1.** Geometries of the four-(A) and six- (B) membered ring TSs obtained for the peptide bond formation catalysed by ribosome, computed at M06-2X/MM level. Distances are reported in Å and charges of the two fragments in a.u.

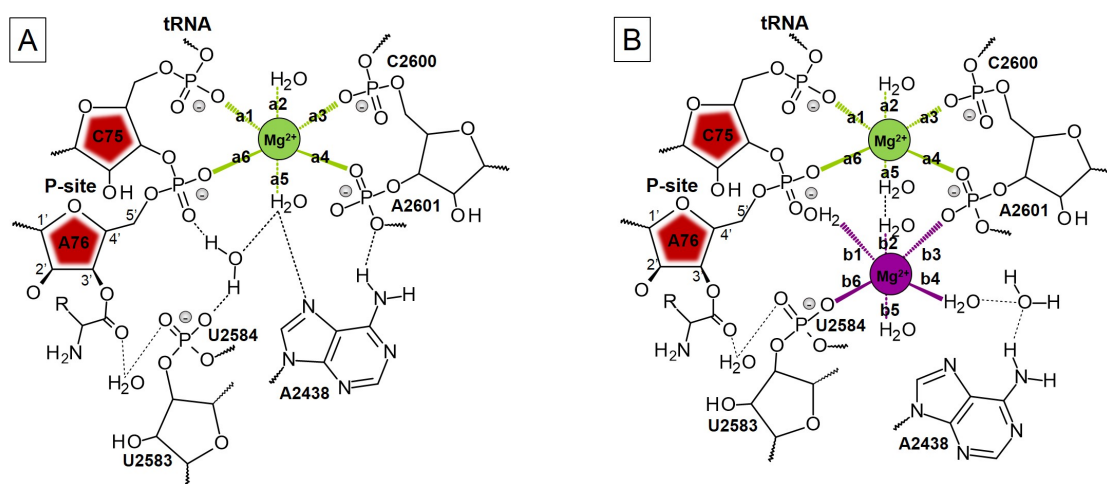

**Figure S2.** Schematic representation of the PTC without (A) and with an additional Mg<sup>2+</sup> (B).

**Table S1.** Interatomic distances (in Å) defining the coordination sphere of Mg<sup>2+</sup> ions in MC and TS. Models A and B as shown in Figure S2.

|                       | <b>a1</b>      | <b>a2</b>      | <b>a3</b>      | <b>a4</b>      | <b>a5</b>      | <b>a6</b>      |
|-----------------------|----------------|----------------|----------------|----------------|----------------|----------------|
| <b>MC<sup>A</sup></b> | 1.89 ±<br>0.04 | 2.08 ±<br>0.08 | 1.93 ±<br>0.05 | 1.89 ±<br>0.04 | 2.07 ±<br>0.07 | 1.94 ±<br>0.05 |
| <b>TS<sup>A</sup></b> | 1.89 ±<br>0.04 | 2.07 ±<br>0.09 | 1.92 ±<br>0.05 | 1.90 ±<br>0.05 | 2.08 ±<br>0.08 | 1.91 ±<br>0.05 |
| <b>MC<sup>B</sup></b> | 1.87 ±<br>0.04 | 2.01 ±<br>0.05 | 1.92 ±<br>0.05 | 1.90 ±<br>0.04 | 2.29 ±<br>0.20 | 1.91 ±<br>0.04 |
| <b>TS<sup>B</sup></b> | 1.86 ±<br>0.04 | 2.01 ±<br>0.06 | 1.91 ±<br>0.05 | 1.90 ±<br>0.04 | 2.27 ±<br>0.15 | 1.91 ±<br>0.05 |
|                       | <b>b1</b>      | <b>b2</b>      | <b>b3</b>      | <b>b4</b>      | <b>b5</b>      | <b>b6</b>      |
| <b>MC<sup>B</sup></b> | 1.97 ±<br>0.06 | 2.00 ±<br>0.06 | 1.88 ±<br>0.04 | 1.98 ±<br>0.05 | 2.51 ±<br>0.74 | 1.88 ±<br>0.04 |
| <b>TS<sup>B</sup></b> | 1.94 ±<br>0.04 | 1.97 ±<br>0.05 | 1.87 ±<br>0.04 | 1.97 ±<br>0.05 | 5.23 ±<br>0.64 | 1.86 ±<br>0.04 |

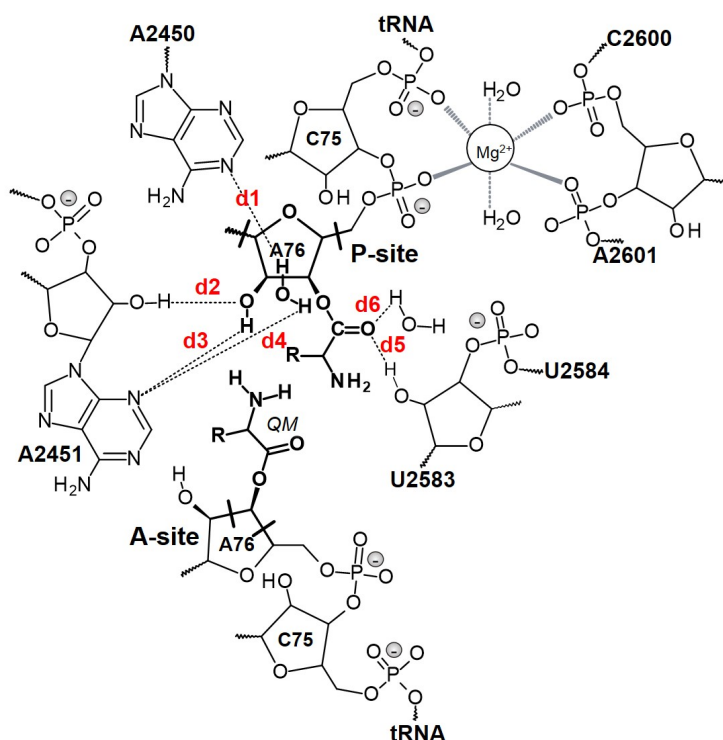

**Figure S3.** Schematic representation of the active site with labels for key intermolecular interactions.

**Table S2.** Average key interatomic distances in RC, ZW and TS-8, as depicted in Figure S3.

|    | Ribosome  |           |           | Ribosome +Mg <sup>2+</sup> |           |           |
|----|-----------|-----------|-----------|----------------------------|-----------|-----------|
|    | RC        | ZW        | TS        | RC                         | ZW        | TS        |
| d1 | 1.91±0.15 | 2.01±0.15 | 2.04±0.11 | 3.33±1.04                  | 2.02±0.13 | 2.03±0.12 |
| d2 | 4.19±0.28 | 3.68±0.99 | 2.98±0.20 | 3.15±0.10                  | 3.97±0.71 | 1.88±0.24 |
| d3 | 3.25±0.12 | 3.39±0.13 | 3.38±0.11 | 3.72±0.11                  | 3.30±0.12 | 3.34±0.11 |
| d4 | 3.97±0.15 | 3.79±0.12 | 3.89±0.10 | 1.97±0.13                  | 3.66±0.11 | 3.82±0.10 |
| d5 | 2.64±0.17 | 2.46±0.15 | 2.49±0.19 | 2.33±0.19                  | 2.03±0.24 | 2.43±0.19 |
| d6 | 2.06±0.29 | 1.86±0.19 | 1.88±0.16 | -                          | -         | -         |

**Figure S4.** Representation of the dipole moments of the QM subsystem in RC and TS-8.

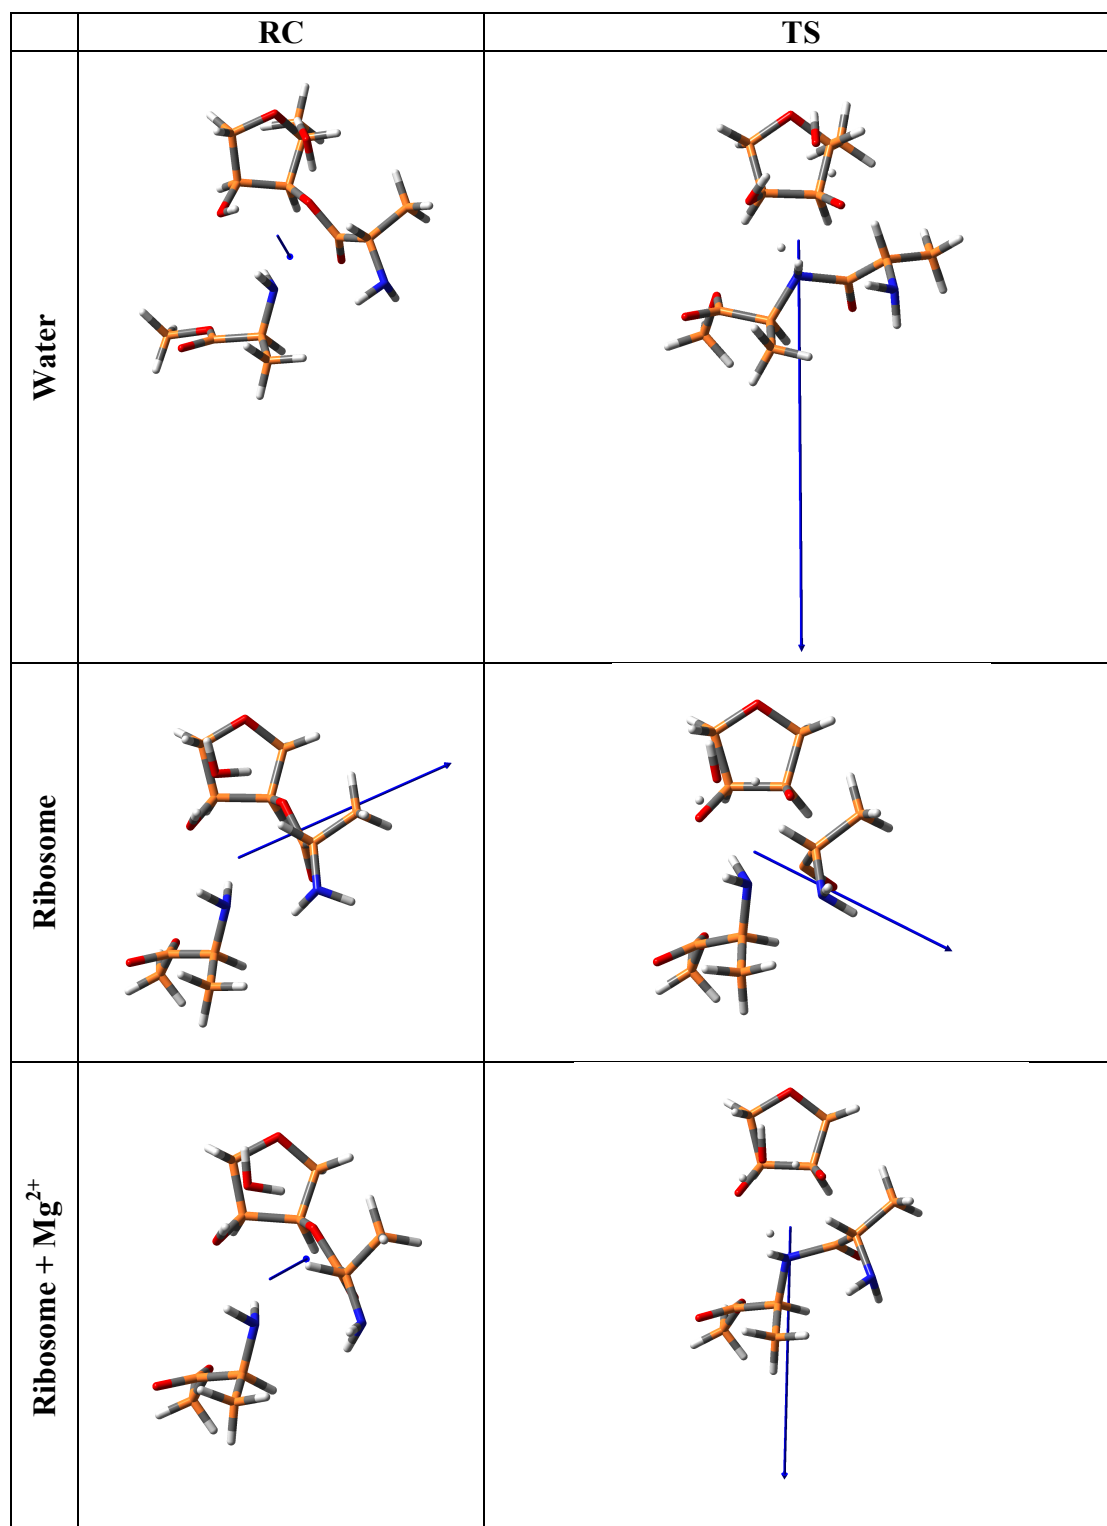

**Table S3.** Cartesian coordinates of QM sub-set of atoms for the TS-4, TS-6 and TS-8 obtained in the ribosome without (A) and with an additional Mg<sup>2+</sup> (B).

**TS-4**

|   |              |             |             |
|---|--------------|-------------|-------------|
| C | -15.92657000 | -2.62748000 | 11.26598000 |
| H | -16.61958000 | -2.65204000 | 10.42602000 |
| O | -16.22568000 | -3.77638000 | 12.10356000 |
| C | -16.05260000 | -3.45699000 | 13.45830000 |
| H | -16.96861000 | -3.71985000 | 14.00388000 |
| C | -16.23632000 | -1.40649000 | 12.15795000 |
| H | -15.61488000 | -0.54983000 | 11.84990000 |
| C | -15.82201000 | -1.93932000 | 13.57266000 |
| H | -14.80686000 | -1.65767000 | 13.86062000 |
| O | -16.68241000 | -1.39920000 | 14.58254000 |
| H | -17.57334000 | -1.68209000 | 14.27278000 |
| O | -17.57428000 | -1.06750000 | 12.23463000 |
| N | -20.99582000 | 1.32861000  | 11.85111000 |
| H | -21.24147000 | 1.74073000  | 12.74569000 |
| H | -20.85623000 | 2.07546000  | 11.17928000 |
| C | -19.87824000 | 0.38294000  | 11.85973000 |
| H | -20.13102000 | -0.44890000 | 12.52268000 |
| C | -19.64530000 | -0.13205000 | 10.44191000 |
| H | -19.07551000 | 0.60263000  | 9.86708000  |
| H | -20.61448000 | -0.30360000 | 9.96955000  |
| H | -19.04791000 | -1.04036000 | 10.47719000 |
| C | -18.60031000 | 1.05403000  | 12.35769000 |
| O | -17.96029000 | 1.87165000  | 11.78728000 |
| C | -14.48847000 | 2.47772000  | 16.07291000 |
| H | -13.57106000 | 1.94998000  | 15.80134000 |
| O | -15.50885000 | 1.69375000  | 15.44639000 |
| N | -18.20422000 | 0.81471000  | 13.85793000 |
| H | -17.49214000 | 0.06233000  | 13.63333000 |
| H | -18.93908000 | 0.32127000  | 14.38987000 |
| C | -17.73053000 | 2.02757000  | 14.58045000 |
| H | -17.13287000 | 2.57403000  | 13.84804000 |
| C | -18.91901000 | 2.85261000  | 15.06095000 |
| H | -19.43415000 | 2.34276000  | 15.87919000 |
| H | -19.61331000 | 3.04560000  | 14.23871000 |
| H | -18.57040000 | 3.81784000  | 15.43262000 |
| C | -16.80363000 | 1.77990000  | 15.79729000 |
| O | -17.18799000 | 1.80430000  | 16.93685000 |
| H | -14.53695000 | 3.40456000  | 15.70061000 |
| H | -14.43625000 | 2.68330000  | 17.05016000 |
| H | -15.31670000 | -3.98242000 | 13.88534000 |
| H | -14.98890000 | -2.69466000 | 10.92503000 |

**TS-6**

|   |              |             |             |
|---|--------------|-------------|-------------|
| C | -15.98752000 | -2.72662000 | 11.21383000 |
| H | -16.66559000 | -2.80759000 | 10.36580000 |
| O | -16.25294000 | -3.84505000 | 12.08603000 |
| C | -16.03571000 | -3.47015000 | 13.42399000 |
| H | -16.94392000 | -3.68227000 | 14.00175000 |
| C | -16.30443000 | -1.49947000 | 12.07059000 |
| H | -15.82298000 | -0.59442000 | 11.67617000 |
| C | -15.78520000 | -1.94849000 | 13.48136000 |
| H | -14.75898000 | -1.64761000 | 13.69893000 |
| O | -16.68250000 | -1.37198000 | 14.41662000 |
| H | -17.48663000 | -1.41805000 | 13.65118000 |
| O | -17.66959000 | -1.27907000 | 12.31152000 |
| N | -20.72104000 | 1.40407000  | 11.88732000 |
| H | -21.03920000 | 1.73907000  | 12.78929000 |
| H | -20.34517000 | 2.18985000  | 11.36747000 |
| C | -19.77100000 | 0.28983000  | 11.91802000 |
| H | -20.15764000 | -0.48061000 | 12.58986000 |
| C | -19.64428000 | -0.27322000 | 10.50381000 |
| H | -19.01646000 | 0.38154000  | 9.89264000  |
| H | -20.64472000 | -0.32782000 | 10.06957000 |
| H | -19.18104000 | -1.25674000 | 10.52492000 |
| C | -18.40292000 | 0.77323000  | 12.41564000 |
| O | -17.67652000 | 1.51896000  | 11.84027000 |
| C | -14.57524000 | 2.49277000  | 16.06370000 |
| H | -13.67556000 | 1.94750000  | 15.76935000 |
| O | -15.62802000 | 1.72300000  | 15.47575000 |
| N | -18.15784000 | 0.73371000  | 13.99329000 |
| H | -17.32603000 | 0.08765000  | 14.12304000 |
| H | -18.92889000 | 0.26361000  | 14.49794000 |
| C | -17.82574000 | 2.05220000  | 14.59592000 |
| H | -17.22686000 | 2.55583000  | 13.83319000 |
| C | -19.05648000 | 2.85772000  | 14.97083000 |
| H | -19.59058000 | 2.39185000  | 15.80266000 |
| H | -19.71651000 | 2.96935000  | 14.10767000 |
| H | -18.75094000 | 3.85809000  | 15.28227000 |
| C | -16.91469000 | 1.90192000  | 15.82743000 |
| O | -17.29880000 | 2.02380000  | 16.96005000 |
| H | -14.61687000 | 3.42393000  | 15.70147000 |
| H | -14.51646000 | 2.68842000  | 17.04261000 |
| H | -15.29737000 | -4.00194000 | 13.83879000 |
| H | -15.03984000 | -2.74840000 | 10.89536000 |

**(A) TS-8**

|   |              |             |             |
|---|--------------|-------------|-------------|
| C | -15.95036000 | -2.67049000 | 11.07572000 |
| H | -16.56935000 | -2.73628000 | 10.18201000 |
| O | -16.25514000 | -3.82376000 | 11.90230000 |
| C | -16.12410000 | -3.49843000 | 13.26250000 |
| H | -17.04382000 | -3.79765000 | 13.77288000 |
| C | -16.38034000 | -1.47088000 | 11.93999000 |
| H | -15.86297000 | -0.55551000 | 11.62550000 |
| C | -15.96270000 | -1.96848000 | 13.35921000 |
| H | -14.94197000 | -1.65034000 | 13.59114000 |
| O | -16.80241000 | -1.48740000 | 14.40685000 |
| H | -17.70732000 | -1.96921000 | 14.23697000 |
| O | -17.76700000 | -1.24144000 | 11.90687000 |
| N | -20.64005000 | 1.42946000  | 11.98360000 |
| H | -20.32132000 | 2.17601000  | 11.37169000 |
| H | -21.61751000 | 1.25976000  | 11.76394000 |
| C | -19.82779000 | 0.22813000  | 11.73864000 |
| H | -20.20068000 | -0.57759000 | 12.38025000 |
| C | -19.80487000 | -0.22920000 | 10.28006000 |
| H | -19.12531000 | 0.40229000  | 9.70032000  |
| H | -20.81252000 | -0.15269000 | 9.86059000  |
| H | -19.44871000 | -1.25547000 | 10.19845000 |
| C | -18.42924000 | 0.63205000  | 12.20558000 |
| O | -17.74545000 | 1.44355000  | 11.65132000 |
| C | -14.58852000 | 2.40867000  | 16.02709000 |
| H | -13.66581000 | 1.88434000  | 15.76828000 |
| O | -15.59590000 | 1.62146000  | 15.37567000 |
| N | -18.21977000 | 0.57861000  | 13.78432000 |
| H | -17.47646000 | -0.15888000 | 13.94621000 |
| H | -19.04989000 | 0.19120000  | 14.26180000 |
| C | -17.79463000 | 1.87029000  | 14.39979000 |
| H | -17.17288000 | 2.34380000  | 13.63677000 |
| C | -18.99839000 | 2.72842000  | 14.76131000 |
| H | -19.52263000 | 2.29791000  | 15.61829000 |
| H | -19.67491000 | 2.79369000  | 13.90626000 |
| H | -18.66994000 | 3.73165000  | 15.03803000 |
| C | -16.91128000 | 1.70763000  | 15.66631000 |
| O | -17.33884000 | 1.75732000  | 16.78986000 |
| O | -18.97152000 | -2.41238000 | 13.59456000 |
| H | -19.20891000 | -3.34376000 | 13.45817000 |
| H | -18.43825000 | -1.95850000 | 12.64843000 |
| H | -14.63215000 | 3.33473000  | 15.65222000 |
| H | -14.55577000 | 2.62106000  | 17.00372000 |
| H | -15.38555000 | -3.97794000 | 13.73642000 |
| H | -14.98706000 | -2.69250000 | 10.80820000 |



**(B) TS-8-Mg**

|   |              |             |             |
|---|--------------|-------------|-------------|
| C | -15.74648000 | -2.77968000 | 10.75632000 |
| H | -16.40836000 | -2.87273000 | 9.89235000  |
| O | -15.94190000 | -3.94623000 | 11.56926000 |
| C | -15.83524000 | -3.63746000 | 12.94361000 |
| H | -16.76074000 | -3.95015000 | 13.43854000 |
| C | -16.17324000 | -1.60441000 | 11.64437000 |
| H | -15.65789000 | -0.67716000 | 11.36210000 |
| C | -15.71286000 | -2.10201000 | 13.04867000 |
| H | -14.69956000 | -1.75892000 | 13.27024000 |
| O | -16.55850000 | -1.59237000 | 14.07055000 |
| H | -17.47220000 | -2.05614000 | 13.90985000 |
| O | -17.55227000 | -1.35233000 | 11.62080000 |
| N | -20.16733000 | 1.76168000  | 11.42206000 |
| H | -20.72319000 | 1.91808000  | 12.25600000 |
| H | -19.49528000 | 2.52353000  | 11.35332000 |
| C | -19.45774000 | 0.46001000  | 11.41626000 |
| H | -19.95544000 | -0.24353000 | 12.09211000 |
| C | -19.49474000 | -0.11966000 | 10.00448000 |
| H | -18.87596000 | 0.48902000  | 9.33808000  |
| H | -20.53189000 | -0.09396000 | 9.65806000  |
| H | -19.11602000 | -1.14030000 | 9.99081000  |
| C | -18.01528000 | 0.69391000  | 11.89199000 |
| O | -17.20996000 | 1.32198000  | 11.26334000 |
| C | -13.93151000 | 2.43708000  | 15.47505000 |
| H | -13.03871000 | 1.91707000  | 15.13620000 |
| O | -15.01754000 | 1.72939000  | 14.81350000 |
| N | -17.76230000 | 0.62599000  | 13.42485000 |
| H | -17.07110000 | -0.17014000 | 13.58994000 |
| H | -18.59043000 | 0.27760000  | 13.93528000 |
| C | -17.27146000 | 1.91247000  | 14.04577000 |
| H | -16.73884000 | 2.43082000  | 13.24848000 |
| C | -18.44897000 | 2.72529000  | 14.55886000 |
| H | -18.90957000 | 2.22914000  | 15.41625000 |
| H | -19.17908000 | 2.89029000  | 13.76202000 |
| H | -18.09611000 | 3.70248000  | 14.88746000 |
| C | -16.27810000 | 1.70030000  | 15.22801000 |
| O | -16.65274000 | 1.60920000  | 16.37013000 |
| O | -18.77156000 | -2.52134000 | 13.31076000 |
| H | -18.92766000 | -3.45120000 | 13.08495000 |
| H | -18.19892000 | -2.00386000 | 12.34193000 |
| H | -13.99724000 | 3.38063000  | 15.15042000 |
| H | -13.84819000 | 2.59566000  | 16.45887000 |
| H | -15.09667000 | -4.14791000 | 13.38402000 |
| H | -14.79460000 | -2.71633000 | 10.45647000 |
